# Supplementary material
Source: HighWire-hosted journal article supplement (https://gh.bmj.com/content/7/5/e008378)
Supplement: inline-supplementary-material-1 [file inline-supplementary-material-1.pdf]

Appendix 1: Stakeholder analysis matrix

Worksheet: Analysing Stakeholders for PIIVeC

Please refer to the guide for direction on completing the below.

PRELIMINARY

| NAME OF PERSON COMPLETING | ID | AIM OF ANALYSIS: Identify stakeholders interested in the issue | ANALYSIS PERIOD START | ANALYSIS PERIOD END | LEVEL |
|---------------------------|----|----------------------------------------------------------------|-----------------------|---------------------|-------|
|                           |    |                                                                |                       |                     |       |
|                           |    |                                                                |                       |                     |       |
|                           |    |                                                                |                       |                     |       |
|                           |    |                                                                |                       |                     |       |

ACTUAL POWER-INTEREST MATRIX

DESIRED POWER-INTEREST MATRIX

STEP 1: STAKEHOLDERS

Identify all stakeholders interested or associated with your issue

| ACTOR TYPE: (INSTITUTION OR INDIVIDUAL) | INSTITUTION ACRONYM or INDIVIDUAL NAME | ROLE (GENERAL) | CATEGORY | CURRENT INVOLVEMENT (ROLE IN KEY ISSUES) | CURRENT INTEREST | CURRENT INFLUENCE | CURRENT POSITION | IMPACT OF ISSUE ON ACTOR | ACTUAL POWER STATUS | ACTUAL INTEREST STATUS | DESIRED POWER STATUS | DESIRED INTEREST STATUS | PROPOSED INTERVENTION |
|-----------------------------------------|----------------------------------------|----------------|----------|------------------------------------------|------------------|-------------------|------------------|--------------------------|---------------------|------------------------|----------------------|-------------------------|-----------------------|
|                                         |                                        |                |          |                                          |                  |                   |                  |                          |                     |                        |                      |                         |                       |
|                                         |                                        |                |          |                                          |                  |                   |                  |                          |                     |                        |                      |                         |                       |
|                                         |                                        |                |          |                                          |                  |                   |                  |                          |                     |                        |                      |                         |                       |
|                                         |                                        |                |          |                                          |                  |                   |                  |                          |                     |                        |                      |                         |                       |
|                                         |                                        |                |          |                                          |                  |                   |                  |                          |                     |                        |                      |                         |                       |
|                                         |                                        |                |          |                                          |                  |                   |                  |                          |                     |                        |                      |                         |                       |
|                                         |                                        |                |          |                                          |                  |                   |                  |                          |                     |                        |                      |                         |                       |
|                                         |                                        |                |          |                                          |                  |                   |                  |                          |                     |                        |                      |                         |                       |
|                                         |                                        |                |          |                                          |                  |                   |                  |                          |                     |                        |                      |                         |                       |

STEP 2: CHARACTERISTICS

Analyse the characteristics of your stakeholders

STEP 3: POWER-INTEREST MATRIX

Map stakeholders on the power-interest matrix

STEP 4: INTERVENTIONS

For priority stakeholders, mapping pathways of change and identifying interventions
